# Supplementary material
Source: publisher site journal article supplement (https://www.dovepress.com/article/463363)
Supplement: Supplementary file 1 [file get_supplementary_file.php]

# Supplementary Material

**Table S1.** Anatomical Therapeutic Chemical (ATC) codes used in the Danish Prescription Registry.

| *Medication* | *ATC-code* |
| --- | --- |
| Non-Vitamin K antagonist oral anticoagulants (NOAC) | B01AF02, B01AE07, B01AF01, B01AF03 |
| Vitamin K antagonist | B01AA03, B01AA04 |
| Aspirin | B01AC06, N02BA01 |
| Adenosine diphosphate receptor inhibitor | B01AC04, B01AC22, B01AC24 |
| Statin | C10AA* |
| β-blocker | C07* |
| ACE-inhibitor | C09A*, C09B* |
| AT2- receptor blockers | C09C*, C09D* |
| Thiazide | C03AA*, C03AB* |
| Calcium channel blocker | C08C*, C08D* |
| Insulin | A10A* |
| **Non-insulin diabetes medicine**  [Metformin, Sulfonylureas, Sulfonamides, Alpha glucosidase inhibitors, Thiazolidinediones, Dipeptidyl peptidase 4 (DPP-4) inhibitors, Glucagon-like peptide-1 (GLP-1) analogues, Sodium-glucose co-transporter 2 (SGLT2) inhibitors] | A10B* |
| Proton pump inhibitors (PPI) | A02BC* |
| ACE indicates angiotensin-converting enzyme; AT2: Angiotensin II.  * Incl. all subcodes | |

**Table S2.** Diagnosis codes used in the Danish National Patient Registry.

| *Diagnosis* | *ICD-8 code* | *ICD-10 code* | *Algorithm* |
| --- | --- | --- | --- |
| **Cardiovascular disease** | | | |
| Myocardial infarction |  | DI21* | Primary or secondary  diagnosis during an acute hospital  contact |
| Haemorrhagic stroke |  | DI60*, DI61*, DS06.6 | Primary or secondary  diagnosis during a hospital  contact |
| Ischemic stroke |  | DI63*, DI64* | Primary or secondary  diagnosis during a hospital  contact |
| Transient ischemic  attack |  | DG45* | Primary or secondary  diagnosis during a hospital  contact |
| Atrial fibrillation |  | DI48* | Inpatient or outpatient hospital diagnosis |
| Hypertension |  | DI10*, DI15.1, DI15.8, DI15.9 | Inpatient or outpatient hospital diagnosis |
| Heart failure |  | DI11.0, DI13.0, DI13.2, DI50* | Inpatient or outpatient hospital diagnosis |
| Peripheral artery disease |  | DI70, DI70.1-DI70.9. DI73.9* | Inpatient or outpatient hospital diagnosis |
| **Microvascular disease** | |  |  |
| Peripheral neuropathy |  | DE104, DE114, DE124, DE134, DE144, DG56*, DG57*, DG58*, DG59*, DG609, DG603, DG61*, DG62*, DG63* DG900, DG909*, DG99* | Inpatient or outpatient hospital diagnosis |
| Nephropathy |  | DR809*, DB289A, DE102, DE112, DE122, DE132, DE142, DE143, DN391, DN06*, DN07*, DN08*, DN14, DN16, DM103, DM350E | Inpatient or outpatient hospital diagnosis |
| Retinopathy |  | DE103, DE113, DE123, DE133, DE143, DH280, DH334B, DH34*, DH350, DH360* | Inpatient or outpatient hospital diagnosis |
| **Other** |  |  |  |
| Renal diseases |  | DI12*, DI13*, DN00-DN05*, DN07*, DN11*, DN14*, DN17-DN19*, DQ61* | Inpatient or outpatient hospital diagnosis |
| Diabetes |  | DE10*-DE14*, DH36.0, DO24.0-24.3, DO24.5-24.9, DG63.2, DN08.3 | Inpatient or outpatient hospital diagnosis |
| Chronic pulmonary disease | 490*-493*, 515*-518* | DJ40*-DJ47*, DJ60*-DJ67*, DJ68.4, DJ70.1, DJ70.3, *DJ84.1, DJ92.0, DJ96.1, DJ98.2, DJ98.3 | Inpatient or outpatient hospital diagnosis |
|  |  |  |  |
| **Surgery** | | | |
| PCI | 30350, 30354, 30359 | KFNG02*, KFNG05*, KFNG96 | Procedure codes |
| CABG | 30009, 30019, 30029, 30039, 30049, 30059, 30069, 30079, 30089, 30099, 30109, 30119, 30120, 30129, 30139, 30149, 30159, 30169, 30179, 30189, 30199, 30200 | KFNA*-KFNE* | Procedure codes |
| CABG indicates coronary artery bypass surgery; ICD: international classification of diseases; PCI: percutaneous coronary intervention. * Including all diagnosis and procedure subcodes | | | |

**Table S3.** Diagnosis codes for cause-specific death categorized according to ICD-10 chapters.

| **ICD-10 chapters** | **ICD-10 codes** |
| --- | --- |
| Infectious diseases including pneumonia | A, B |
| Hematological diseases | D5-D8 |
| Endocrine, nutritional and metabolic disorders | E |
| Diabetes-related | E1 |
| Mental and behavioral disorders | F |
| Diseases of the nervous system | G |
| Diseases of the eye and adnexa | H0-H5 |
| Diseases of the ear and mastoid process | H6-H9 |
| Diseases of the circulatory system | I |
| Diseases of the respiratory system | J |
| Diseases of the digestive system | K |
| Diseases of the skin and subcutaneous tissue | L |
| Diseases of the musculoskeletal system and connective tissue | M |
| Diseases of the genitourinary system | N |
| Pregnancy, childbirth and the puerperium | O |
| Conditions originating in the perinatal period | P |
| Congenital malformations, deformations and chromosomal abnormalities | Q |
| Symptoms, signs and abnormal clinical and laboratory findings | R |
| Injury and poisoning | S, T |
| External causes of morbidity and mortality | X, Y |

ICD indicates international classification of diseases.

| **Table S4.** Ten-year risk of all-cause and cause-specific mortality censoring follow-up at time of diabetes diagnose and/or coronary artery disease diagnosis | | | | |
| --- | --- | --- | --- | --- |
|  | Events | 10-year CIP* (95% CI) | Unadjusted HR (95% CI) | Adjusted† HR (95% CI) |
| **All-cause death** |  |  |  |  |
| No DM or CAD | 6146 | 18.5% (18.1-19.0) | ref | ref |
| DM only | 1217 | 27.1% (25.7-28.5) | 1.49 (1.41-1.59) | 1.47 (1.38-1.56) |
| CAD only | 14645 | 30.0% (29.5-28.5) | 1.72 (1.57-1.77) | 1.27 (1.23-1.31) |
| DM & CAD | 4745 | 43.3% (42.3-44.4) | 2.75 (2.65-2.86) | 2.07 (1.99-2.14) |
| **Cancer death** |  |  |  |  |
| No DM or CAD | 1700 | 5.2% (4.9-5.4) | ref | ref |
| DM only | 309 | 7.2% (6.4-8.0) | 1.38 (1.22-1.56) | 1.34 (1.19-1.52) |
| CAD only | 3567 | 7.6% (7.4-7.9) | 1.53 (1.45-1.62) | 1.15 (1.08-1.22) |
| DM & CAD | 840 | 7.9% (7.3-8.4) | 1.80 (1.65-1.95) | 1.35 (1.24-1.47) |
| **Circulatory death** |  |  |  |  |
| No DM or CAD | 2211 | 6.5% (6.2-6.7) | ref | ref |
| DM only | 404 | 8.4% (7.6-9.3) | 1.37 (1.23-1.52) | 1.34 (1.20-1.49) |
| CAD only | 6997 | 13.5% (13.2-13.8) | 2.25 (2.14-2.36) | 1.62 (1.54-1.70) |
| DM & CAD | 2139 | 18.8% (18.0-19.5) | 3.37 (3.17-3.57) | 2.46 (2.31-2.61) |
| **Endocrinologic death** |  |  |  |  |
| No DM or CAD | 70 | 0.2% (0.2-0.3) | ref | ref |
| DM only | 161 | 3.7% (0.3.1-4.3) | 17.48 (13.20-23.14) | 17.40 (13.14-23.04) |
| CAD only | 81 | 0.2% (0.1-0.2) | 0.84 (0.61-1.16) | 0.71 (0.51-0.98) |
| DM & CAD | 702 | 6.6% (6.1-7.2) | 36.30(28.39-46.41) | 30.96 (24.15-39.71) |
| CAD: coronary artery disease; CI: confidence interval; DM: diabetes mellitus; HR: hazard ratio.  * Accounting for the competing risk of other causes of death  † Adjusted for sex and age | | | | |

**Table S5.** Ten-year risk of all-cause death and cause-specific death by DM and CAD, adjusted for cardiovascular risk factors and microvascular disease.

|  | Patients | Events | Unadjusted HR (95% CI) | Adjusted† HR (95% CI) | | Adjusted‡ HR (95% CI) |
| --- | --- | --- | --- | --- | --- | --- |
| **All-cause death** |  |  |  |  | |  |
| No DM or CAD | 44,309 | 6877 | ref | ref | | ref |
| DM only | 6,195 | 1291 | 1.46 (1.37-1.55) | 1.43 (1.35-1.52) | | 1.60 (1.48-1.72) |
| CAD only | 67,466 | 15611 | 1.64 (1.59-1.69) | 1.22 (1.19-1.26) | | 1.47 (1.41-1.52) |
| DM & CAD | 14,462 | 4745 | 2.59 (2.50-2.69) | 1.95 (1.76-2.02) | | 2.28 (2.16-2.40) |
| **Cancer death** |  |  |  |  | |  |
| No DM or CAD | 44,309 | 1887 | ref | ref | | ref |
| DM only | 6,195 | 319 | 1.33 (1.18-1.49) | 1.29 (1.15-1.46) | | 1.51 (1.31-1.73) |
| CAD only | 67,466 | 3897 | 1.51 (1.43-1.59) | 1.14 (1.08-1.21) | | 1.23 (1.15-1.33) |
| DM & CAD | 14,462 | 840 | 1.72 (1.58-1.86) | 1.30 (1.19-1.41) | | 1.52 (1.36-1.68) |
| **Endocrinologic death** |  |  |  |  | |  |
| No DM or CAD | 44,309 | 98 | ref | ref | | ref |
| DM only | 6,195 | 175 | 14.08 (11.00-18.03) | 14.02 (10.95-17.95) | | 11.28 (8.23-15.74) |
| CAD only | 67,466 | 145 | 1.08 (0.84-1.40) | 0.89 (0.69-1.15) | | 1.04 (0.74-1.45) |
| DM & CAD | 14,462 | 702 | 27.68 (22.40-34.21) | 23.08 (18.62-28.61) | | 18.90 (14.04-25.43) |
| **Circulatory death** |  |  |  |  | |  |
| No DM or CAD | 44,309 | 2472 | ref | ref | | ref |
| DM only | 6,195 | 444 | 1.38 (1.24-1.52) | 1.35 (1.22-1.49) | | 1.51 (1.33-1.72) |
| CAD only | 67,466 | 7310 | 2.10 (2.01-2.20) | 1.53 (1.46-1.60) | | 1.85 (1.74-1.97) |
| DM & CAD | 14,462 | 2139 | 18.8% (18.0-19.5) | | 3.14 (2.97-3.33) | 2.80 (2.58-3.04) |

CAD indicates coronary artery disease; CI: confidence interval; DM: diabetes mellitus; HR: hazard ratio.

† Adjusted for sex and age

‡Adjusted for sex, age, active smoking, hypertension, statin treatment, body mass index, and microvascular disease.

**Table S6.** Ten-year risk of all-cause death and cause-specific death in DM patients without CAD by the presence of microvascular DM-related complications (retinopathy, nephropathy, peripheral neuropathy).

|  | Patients | Events | 10-year CIP* (95% CI) | Unadjusted HR (95% CI) | Adjusted† HR (95% CI) | Adjusted‡ HR (95% CI) |
| --- | --- | --- | --- | --- | --- | --- |
| **All-cause death** |  |  |  |  |  |  |
| No microvascular disease | 4,887 | 934 | 25.7% (24.1-27.3) | ref | ref | ref |
| Microvascular disease | 1,308 | 357 | 36.0% (32.8-39.4) | 1.49 (1.32-1.68) | 1.61 (1.42-1.82) | 1.66 (1.44-1.90 |
| **Cancer death** |  |  |  |  |  |  |
| No microvascular disease | 4,887 | 246 | 7.7% (6.8-8.8) | ref | ref | ref |
| Microvascular disease | 1,308 | 73 | 9.7% (7.6-12.35) | 1.16 (0.89-1.50) | 1.26 (0.97-1.64) | 1.25 (0.93-1.66) |
| **Circulatory death** |  |  |  |  |  |  |
| No microvascular disease | 4,887 | 336 | 9.4% (8.4-10.6) | ref | ref | ref |
| Microvascular disease | 1,308 | 108 | 11.6% (9.5-14.1) | 1.24 (1.00-1.54) | 1.35 (1.09-1.68) | 1.37 (1.07-1.76) |
| **Endocrinologic death** |  |  |  |  |  |  |
| No microvascular disease | 4,887 | 86 | 2.8% (2.3-3.6) | ref | ref | ref |
| Microvascular disease | 1,308 | 89 | 11.1% (8.9-13.8) | 4.04 (3.01-5.44) | 4.26 (3.16-5.73) | 4.29 (3.08-5.99) |
| CAD indicates coronary artery disease; CI: confidence interval; CIP: cumulative incidence proportion; DM: diabetes mellitus; HR: hazard ratio.  * Accounting for the competing risk of other causes of death  † Adjusted for sex and age  ‡Adjusted for sex, age, active smoking, hypertension, statin treatment | | | | | |  |

**Table S7**. All-cause and cause-specific mortality among patients without CAD by type of diabetes.

|  | Patients  (Events) | 10-year CIP* (95% CI) | Unadjusted HR (95% CI) | Adjusted† HR (95% CI) |
| --- | --- | --- | --- | --- |
| **All-cause death** |  |  |  |  |
| No DM | 44,309 (6877) | 19.7% (19.3-20.1) | ref | Ref |
| Type 1 DM | 554 (132) | 29.7% (25.4-34.5) | 1.61 (1.35-1.91) | 2.12 (1.79-2.52) |
| Type 2 DM | 5,641 (1159) | 27.7% (26.2-29.2) | 1.44 (1.36-1.54) | 1.38 (1.29-1.47) |
| **Cancer death** |  |  |  |  |
| No DM | 44,309 (1887) | 5.4% (5.2-5.7) | ref | ref |
| Type 1 DM | 554 (25) | 6.2% (4.0-9.0) | 1.11 (0.75-1.65) | 1.46 (0.98-2.17) |
| Type 2 DM | 5,641 (294) | 7.2% (6.4-8.1) | 1.34 (1.19-1.52) | 1.27 (1.12-1.43) |
| **Circulatory death** |  |  |  |  |
| No DM | 44,309 (2472) | 6.9% (6.7-7.2) | ref | ref |
| Type 1 DM | 554 (31) | 6.5% (4.5-9.1) | 1.05 (0.73-1.52) | 1.43 (1.01-2.04) |
| Type 2 DM | 5,641 (413) | 9.3% (8.4-10.3) | 1.42 (1.28-1.57) | 1.34 (1.21-1.49) |
| **Endocrinologic death** |  |  |  |  |
| No DM | 44,309 (98) | 0.3% (0.2-0.4) | ref | ref |
| Type 1 DM | 554 (48) | 10.9% (8.1-14.2) | 41.23 (29.19-58.23) | 48.02 (33.79-68.26) |
| Type 2 DM | 5,641 (127) | 3.2% (2.6-3.8) | 11.25 (8.64-14.65) | 11.05 (8.49-14.40) |
| CI: confidence interval; DM: diabetes mellitus; HR: hazard ratio.  * Accounting for the competing risk of other causes of death  † Adjusted for sex and age | | | | |

**Table S8.** Ten-year risk of cause-specific mortality accounting for the competing risk of other causes of death.

|  | Unadjusted sHR (95% CI) | Adjusted* sHR (95% CI) |
| --- | --- | --- |
| **Cancer death** |  |  |
| No DM or CAD | ref | ref |
| DM only | 1.27 (1.13-1.43) | 1.22 (1.09-1.38) |
| CAD only | 1.42 (1.34-1.50) | 1.10 (1.04-1.17) |
| DM & CAD | 1.47 (1.36-1.60) | 1.11 (1.02-1.21) |
| **Circulatory death** |  |  |
| No DM or CAD | ref | ref |
| DM only | 1.34 (1.21-1.48) | 1.30 (1.18-1.44) |
| CAD only | 2.07 (1.98-2.16) | 1.52 (1.45-1.59) |
| DM & CAD | 2.95 (2.79-3.13) | 2.16 (2.03-2.29) |
| **Endocrinologic death** |  |  |
| No DM or CAD | ref | ref |
| DM only | 13.57 (10.59-17.37) | 13.40 (10.47-17.16) |
| CAD only | 1.01 (0.78-1.30) | 0.86 (0.67-1.11) |
| DM & CAD | 24.07 (19.49-29.73) | 20.61 (16.62-25.55) |
| CAD indicates coronary artery disease; CI: confidence interval; DM: diabetes mellitus; sHR: subdistribution hazard ratio.  * Adjusted for sex and age | | |
